# Supplementary material for: Divergent Rhabdovirus Discovered in a Patient with New-Onset Nodding Syndrome
Source: MDPI journal article supplement (doi:10.3390/v14020210), 2022-01-21
Supplement: s1 [file s1]

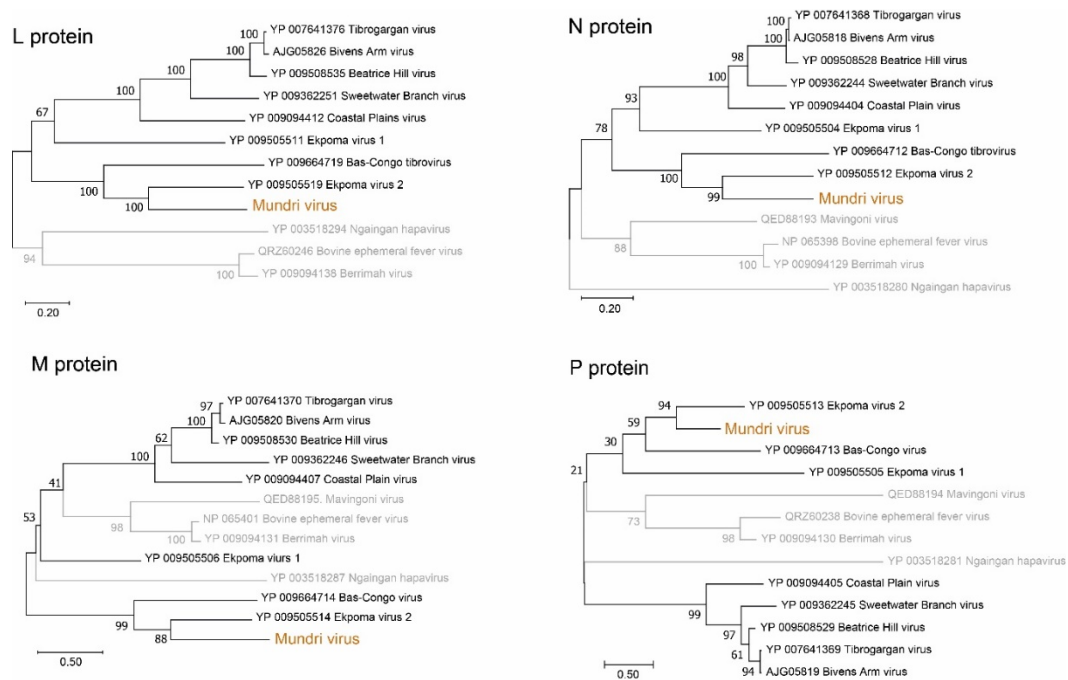

**Figure S1.** Phylogenetic reconstruction of Mundri virus L, N, M and P proteins with its closest ancestors.

**Table S1.** No clustering of Mundri virus seropositivity among children living in the same household in South Sudan.

|          |          | Household Controls |          |       |
|----------|----------|--------------------|----------|-------|
|          |          | Negative           | Positive | Total |
| NS cases | Negative | 33                 | 9        | 42    |
|          | Positive | 13                 | 4        | 17    |
|          | Total    | 46                 | 13       | 59    |

$p$  value = 1, Fisher's exact test.

**Table S2.** No association between Mundri virus seropositivity and *M. perstans* microscopical positivity.

|                    |          | Mundri Virus |              | Total |
|--------------------|----------|--------------|--------------|-------|
|                    |          | Seronegative | Seropositive |       |
| <i>M. perstans</i> | Negative | 82           | 27           | 109   |
|                    | Positive | 35           | 5            | 40    |
|                    | Total    | 117          | 32           | 149   |

$p$  value = 0.12, Fisher's exact test.
